# Supplementary material for: Gut microbiota modification suppresses the development of pulmonary arterial hypertension in an SU5416/hypoxia rat model
Source: PubMed Central journal article supplement — Pulm Circ. 2020 Aug 27;10(3):2045894020929147. doi: 10.1177/2045894020929147 (PMC7457673; doi:10.1177/2045894020929147), 2020-08-27
Supplement: sj-pdf-1-pul-10.1177_2045894020929147.pdf [file sj-pdf-1-pul-10.1177_2045894020929147.pdf]

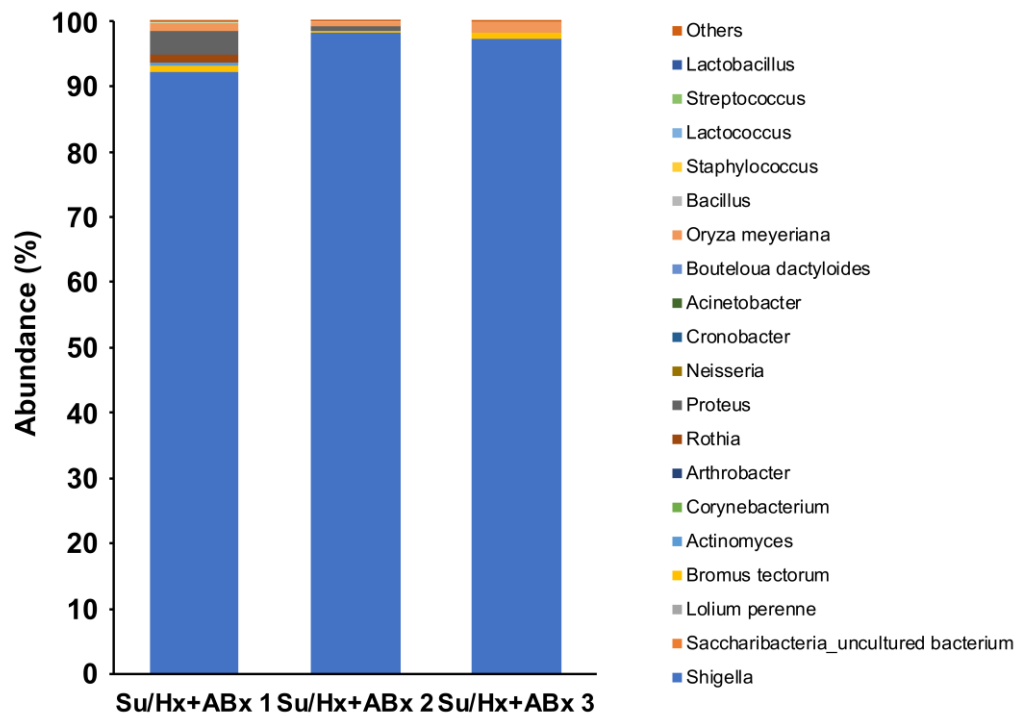

**Supplemental Figure. The gut microbiota composition of Su/Hx+ABx rats at the genus level**

The abundance of *Shigella* was  $95.8 \pm 3.1\%$ .
